# Supplementary material for: Toxicity and safety study of silver and gold nanoparticles functionalized with cysteine and glutathione
Source: PubMed Central journal article supplement (PMC6753685; doi:10.3762/bjnano.10.175), 2019-09-02
Supplement: Beilstein_J_Nanotechnol-10-1802-s001.pdf [file Beilstein_J_Nanotechnol-10-1802-s001.pdf]

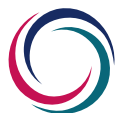

## Supporting Information

for

### **Toxicity and safety study of silver and gold nanoparticles functionalized with cysteine and glutathione**

Barbara Pem, Igor M. Pongrac, Lea Ulm, Ivan Pavičić, Valerije Vrček,  
Darija Domazet Jurašin, Marija Ljubojević, Adela Krivozlavek and Ivana Vinković Vrček

*Beilstein J. Nanotechnol.* **2019**, *10*, 1802–1817. doi:10.3762/bjnano.10.175

## Additional figures and tables

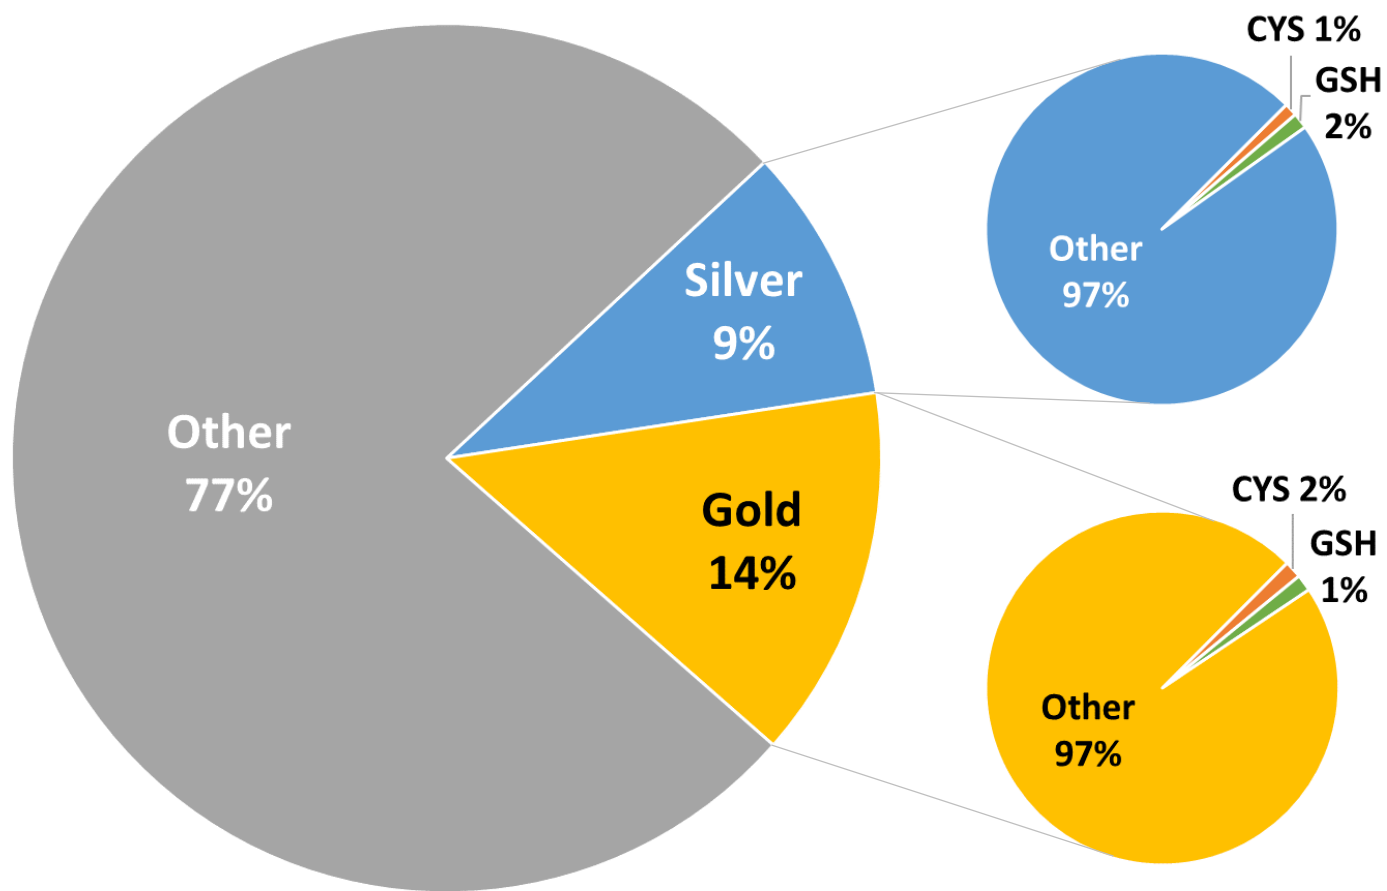

**Figure S1:** The percentage of research papers focusing on silver (AgNPs) and gold nanoparticles (AuNPs) out of the total amount of papers discussing nanoparticles for biomedical applications (larger chart). Two smaller charts present the percentage of papers on interaction of AgNPs and AuNPs with cysteine (CYS) or glutathione (GSH).

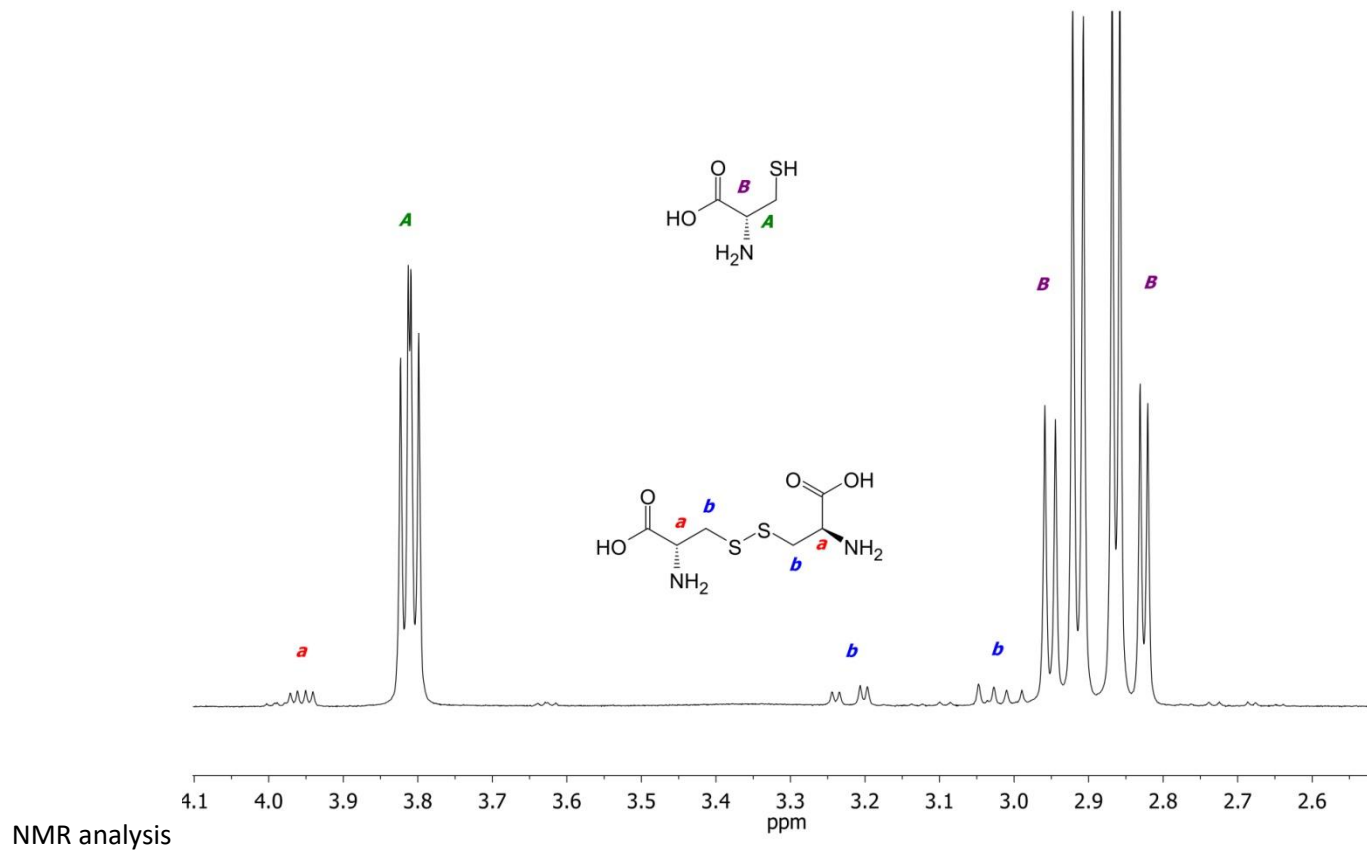

**Figure S2:**  $^1\text{H}$  NMR spectrum of the mixture cysteine : cystine = 25 : 1, in  $\text{D}_2\text{O}$ . Commercial samples (Sigma Aldrich) of both compounds were used.

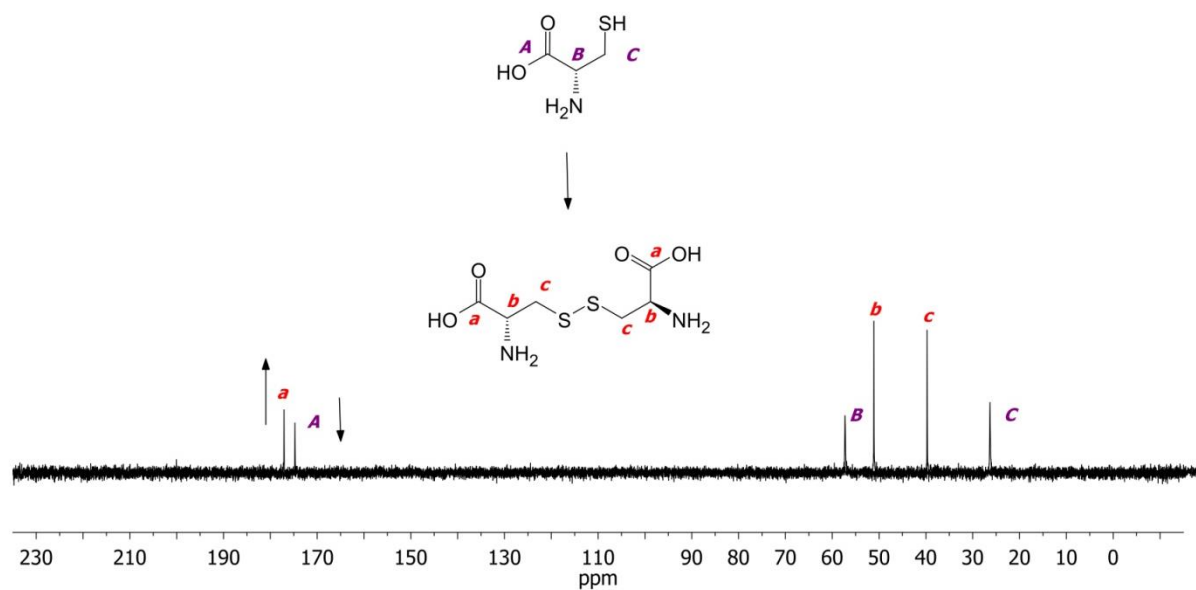

**Figure S3:**  $^{13}\text{C}$  NMR spectrum of the reaction mixture cysteine :  $\text{NaBH}_4 = 1 : 10$ , in  $\text{D}_2\text{O}$ . The aliquot is taken after 75 min. The arrows show how signals (for cysteine and cystine) change with time.

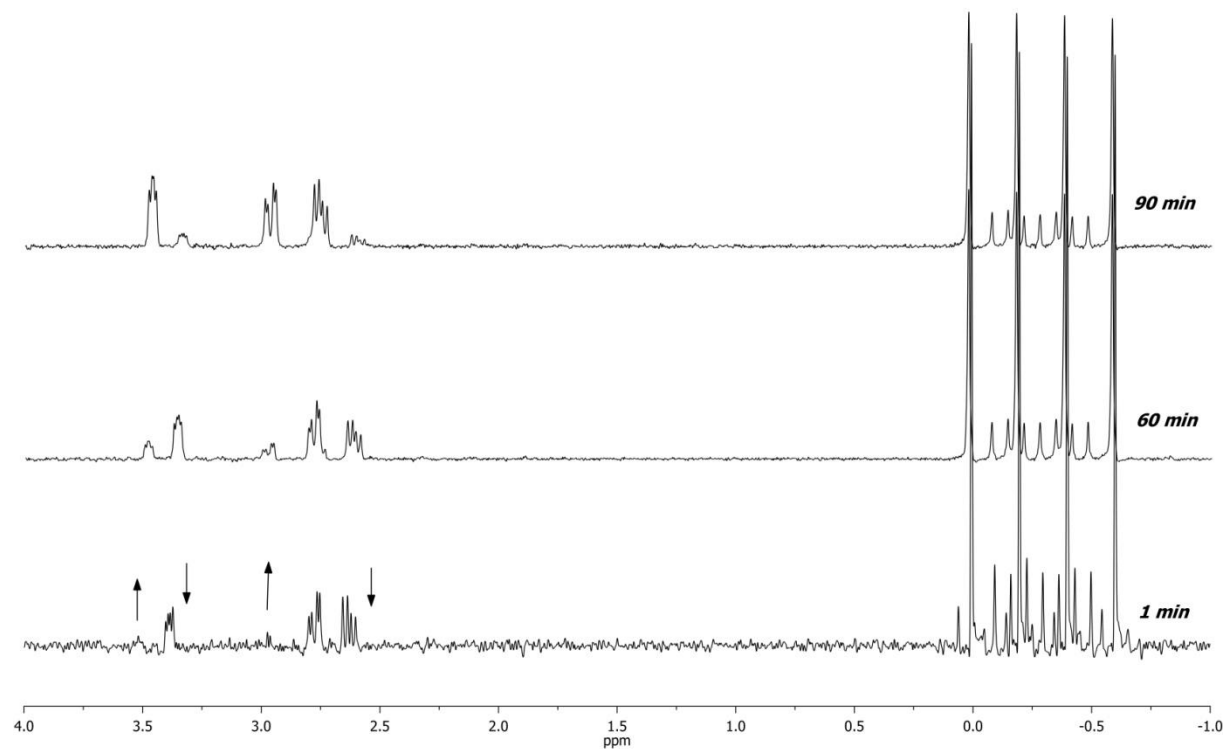

**Figure S4:**  $^1\text{H}$  NMR spectra of the reaction mixture aliquots (cysteine :  $\text{NaBH}_4 = 1 : 10$ , in ultrapure water/ $\text{D}_2\text{O}$  added) taken at several time points. The arrows show how signals (for cysteine and cystine) change with time. Upfield signals correspond to  $\text{NaBH}_4$ .

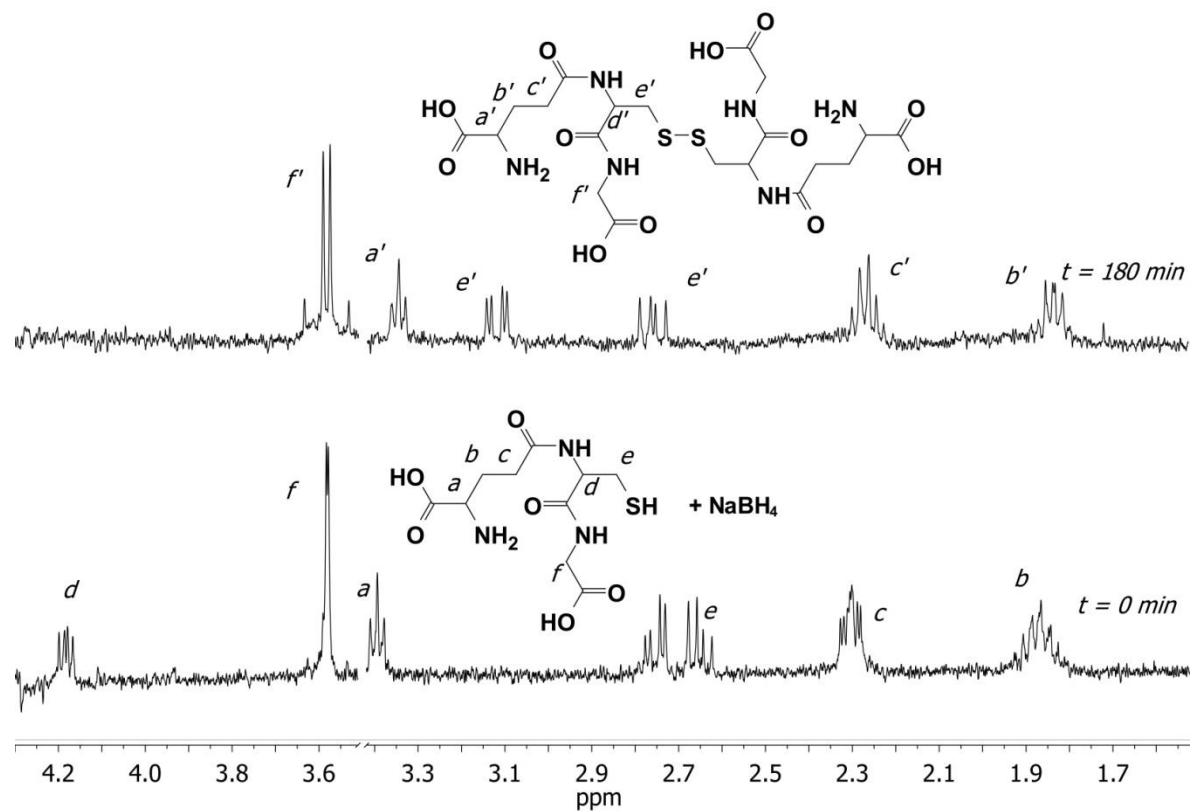

**Figure S5:** <sup>1</sup>H NMR spectra of the reaction mixture aliquots (GSH : NaBH<sub>4</sub> = 1 : 10, in ultrapure water/D<sub>2</sub>O added) taken at several time points.

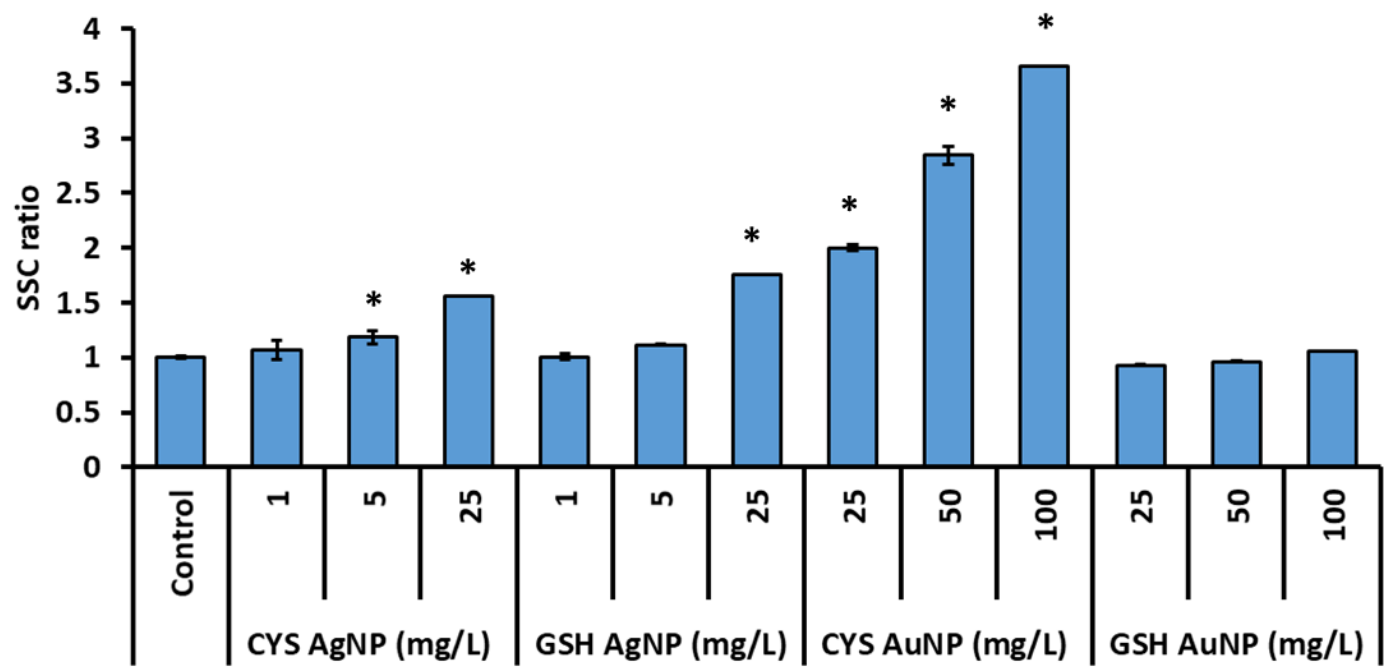

**Figure S6:** Uptake of silver (AgNPs) and gold nanoparticles (AuNPs) stabilized with cysteine (CYS) or glutathione (GSH) in L929 cells.

Values marked with asterisk (\*) differ significantly from the negative control ( $P < 0.05$ ).

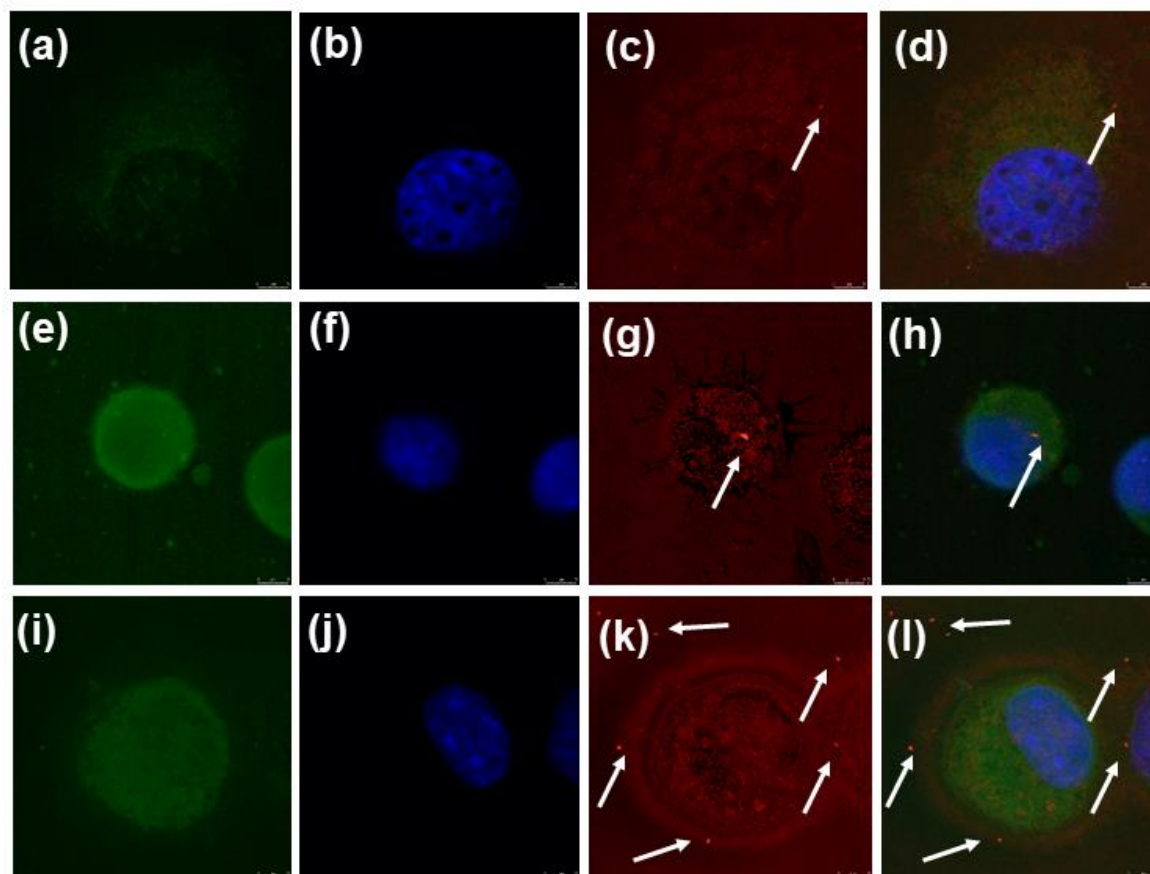

**Figure S7:** Visualization of cellular internalization of silver (AgNPs) and gold nanoparticles (AuNPs) stabilized with cysteine (CYS) or glutathione (GSH) in L929 cells by reflection contrast mode of confocal laser scanning microscopy. Images show maximum intensity Z-projections of cells stained with F-actin-phalloidin to visualize cell cytoskeleton (green), nucleic acid staining using Hoechst 33258 fluorescent dye (blue) and CLSM reflectance signals (red). Overlay of fluorescence stains and segmented reflectance signals are given in (d), (h) and (l) panels. Panels (a-d): Cells treated with CYS-AgNPs (at the 5 mg Ag L<sup>-1</sup>). Panels (e-h): Cells treated with GSH-AgNPs (at the 5 mg Ag L<sup>-1</sup>). Panels (i-l): Cells treated with GSH-AuNPs (at the 25 mg Ag L<sup>-1</sup>). The NPs reflectance signals are visible as bright red signals and indicated by white arrows in panels (c-d), (g-h) and (k-l). The GSH-AuNPs can be found in the vicinity of L929 cells, but not intracellularly (k-l).



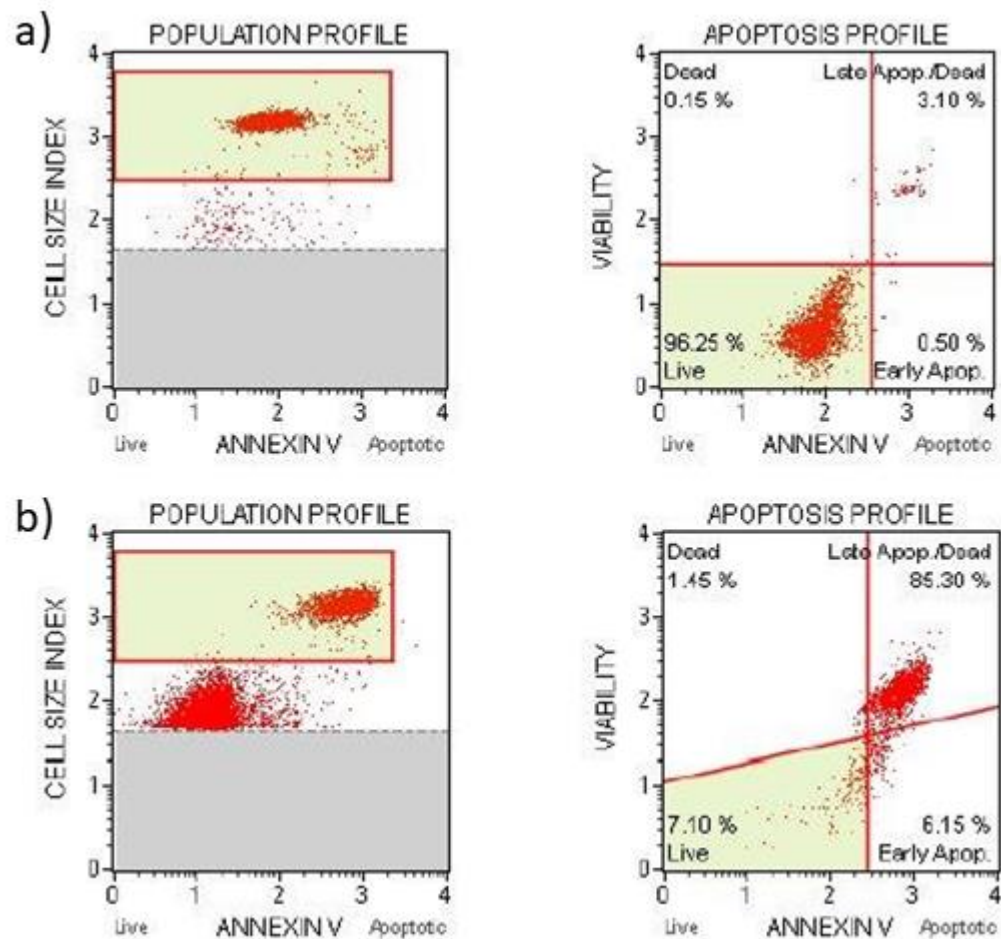

**Figure S8:** Population and apoptosis profiles of L929 cells analysed by flow cytometry using Muse® Annexin V and Dead Cell Assay Kit. (a) Negative controls - untreated control cells. (b) Positive controls - cells treated with paraformaldehyde (0.04 mg L<sup>-1</sup>).

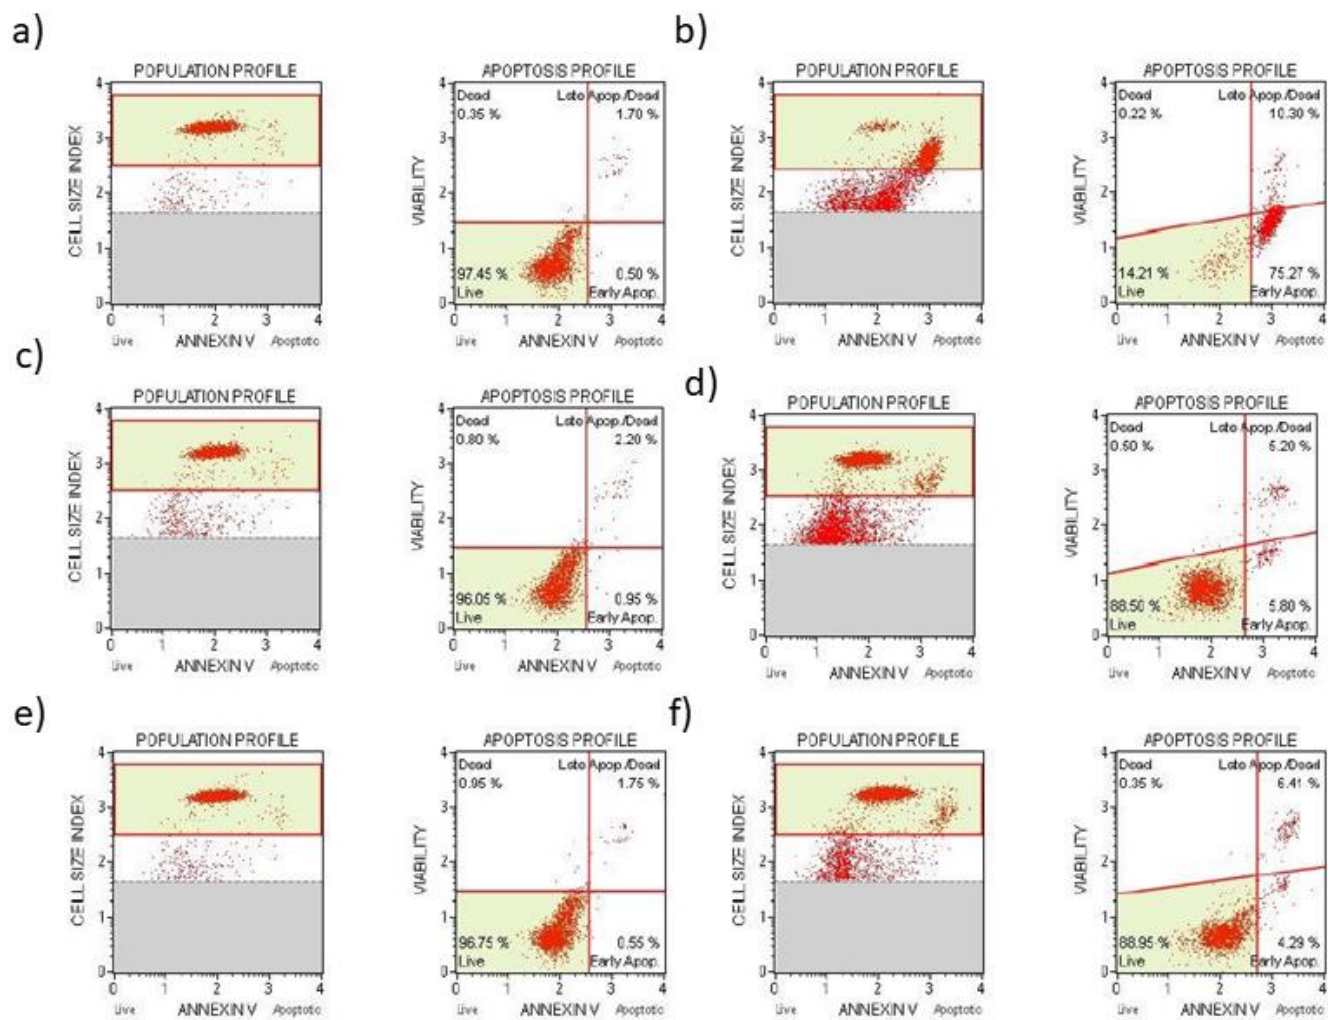

**Figure S9:** Population and apoptosis profiles of L9292 cells analysed by flow cytometry using Muse® Annexin V and Dead Cell Assay Kit. Cells treated with (a) 0.1 mg/L Ag<sup>+</sup>, (b) 1 mg/L Ag<sup>+</sup>, (c) 1 mg/L CYS-AgNPs, (d) 10 mg/L CYS-AgNPs, (e) 1 mg/L GSH-AgNPs and (f) 10 mg/L GSH-AgNPs.

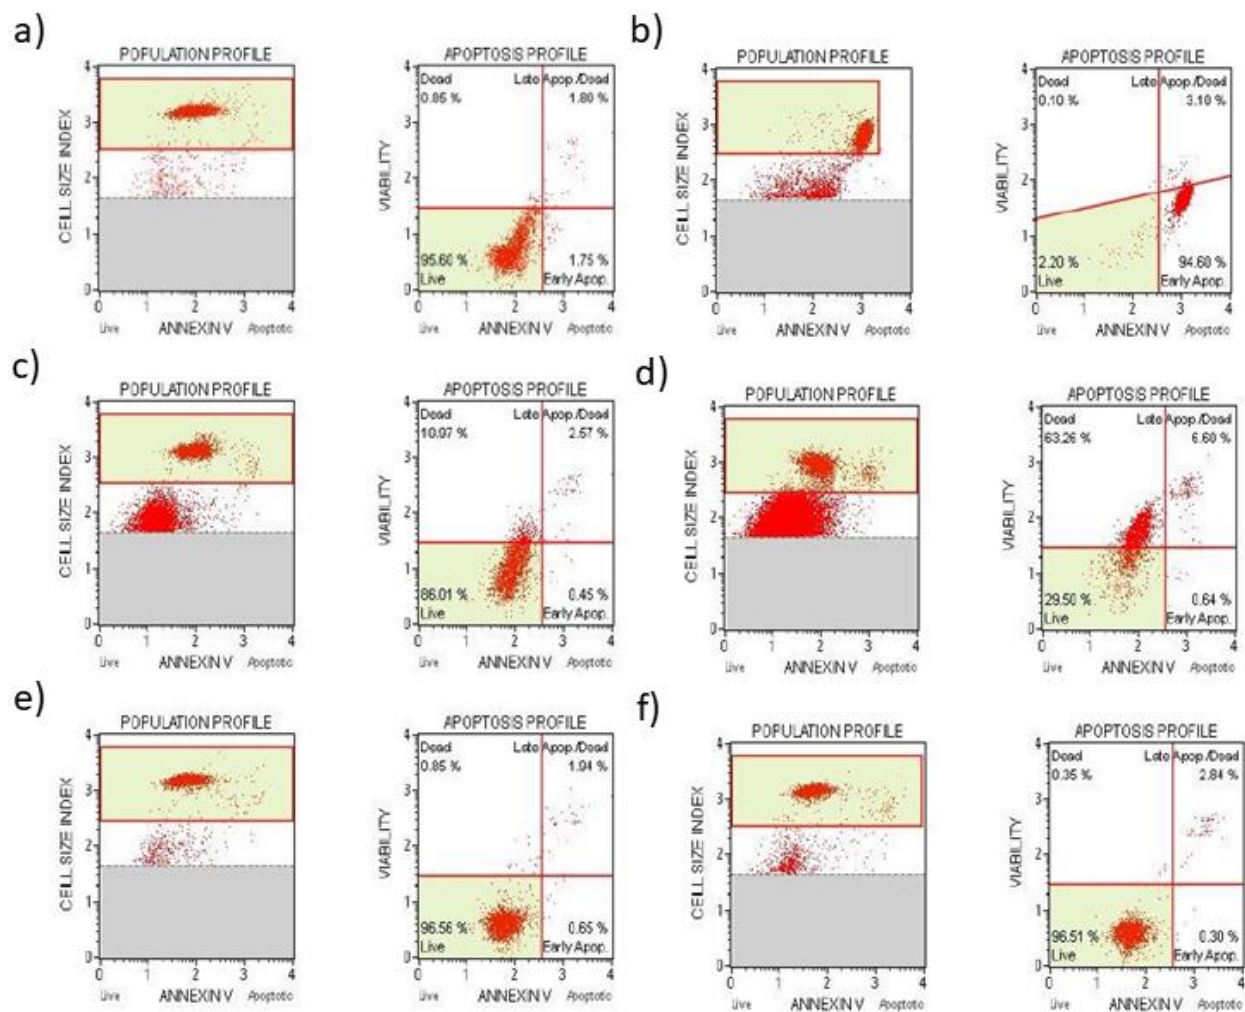

**Figure S10:** Population and apoptosis profiles of L9292 cells analysed by flow using Muse® Annexin V and Dead Cell Assay Kit. Cells treated with (a) 1 mg/L Au<sup>3+</sup>, (b) 25 mg/L Au<sup>3+</sup>, (c) 50 mg/L CYS-AuNPs, (d) 300 mg/L CYS-AuNPs, (e) 50 mg/L GSH-AuNPs and (f) 300 mg/L GSH-AuNPs.

**Table S1:** List of different methods employed for preparation of silver nanoparticles (AgNPs) in the presence of cysteine (CYS) and glutathione (GSH).

| Biothiol | [AgNO <sub>3</sub> ], mM | [AgNO <sub>3</sub> ]/[NaBH <sub>4</sub> ]/[biothiol] | Last added reactant | Visual observation                          | Size [nm] (% Volume) |
|----------|--------------------------|------------------------------------------------------|---------------------|---------------------------------------------|----------------------|
| CYS      | 1                        | 1 : 2 : 0.2                                          | CYS                 | Brown, stable                               | 3.0 ± 0.3 (100%)     |
| CYS      | 1                        | 1 : 2 : 0.2                                          | NaBH <sub>4</sub>   | Dark brown, stable                          | 15.5 ± 2.0 (100%)    |
| CYS      | 1                        | 1 : 2 : 0.5                                          | CYS                 | Brown-gray, stable                          | n.a.                 |
| CYS      | 1                        | 1 : 2 : 0.5                                          | NaBH <sub>4</sub>   | Dark gray, black precipitate                | n.a.                 |
| CYS      | 1                        | 1 : 10 : 0.2                                         | CYS                 | Brown, unstable                             | 3.3 ± 0.6 (100%)     |
| CYS      | 1                        | 1 : 10 : 0.2                                         | NaBH <sub>4</sub>   | Brown, unstable                             | 1.7 ± 0.8 (98%)      |
| CYS      | 5.6                      | 1 : 10 : 1                                           | NaBH <sub>4</sub>   | Dark greenish-gray, stable but precipitates | 15.2 ± 1.7 (2%)      |
| GSH      | 1                        | 1 : 2 : 0.2                                          | GSH                 | Brown, stable                               | 8.0 ± 0.9 (99%)      |
| GSH      | 1                        | 1 : 2 : 0.2                                          | NaBH <sub>4</sub>   | Dark brown, stable                          | 30.9 ± 9.8 (<1%)     |
| GSH      | 1                        | 1 : 2 : 0.5                                          | GSH                 | Brownish-gray, stable                       | 4.8 ± 1.2 (99%)      |
| GSH      | 1                        | 1 : 2 : 0.5                                          | NaBH <sub>4</sub>   | Dark gray, black precipitate                | 51.6 ± 3.4 (<1%)     |
| GSH      | 1                        | 1 : 10 : 0.2                                         | GSH                 | Brownish, stable                            | n.a.                 |
| GSH      | 5.6                      | 1 : 10 : 1                                           | NaBH <sub>4</sub>   | Brown, stable                               | 14.6 ± 3.1 (18%)     |
|          |                          |                                                      |                     |                                             | 46.9 ± 6.3 (82%)     |
|          |                          |                                                      |                     |                                             | 6.0 ± 1.2 (99%)      |
|          |                          |                                                      |                     |                                             | 315.1 ± 74.3 (<1%)   |

**Table S2:** List of different methods employed for preparation of gold nanoparticles (AuNPs) in the presence of cysteine (CYS) and glutathione (GSH).

| Biothiol | [HAuCl <sub>4</sub> ], mM | [HAuCl <sub>4</sub> ]/[NaBH <sub>4</sub> ]/[biothiol] | Last added reactant | Visual observation                            | Size [nm] (% Volume)                                     |
|----------|---------------------------|-------------------------------------------------------|---------------------|-----------------------------------------------|----------------------------------------------------------|
| CYS      | 1                         | 1 : 2 : 0.2                                           | CYS                 | Dark red, turns blue-gray, unstable           | n.a.                                                     |
| CYS      | 1                         | 1 : 2 : 0.2                                           | NaBH <sub>4</sub>   | Unstable                                      | n.a.                                                     |
| CYS      | 1                         | 1 : 2 : 1                                             | CYS                 | Purple, precipitates                          | n.a.                                                     |
| CYS      | 1                         | 1 : 2 : 1                                             | NaBH <sub>4</sub>   | Unstable, black precipitate                   | n.a.                                                     |
| CYS      | 1                         | 1 : 10 : 0.2                                          | NaBH <sub>4</sub>   | Yellow, turns purple, stable                  | 10.7 ± 3.7 (30%)<br>48.5 ± 5.8 (70%)                     |
| CYS      | 3                         | 1 : 10 : 1                                            | NaBH <sub>4</sub>   | Yellow, turns purple, stable but precipitates | 24.2 ± 3.4 (54%)<br>80.0 ± 2.1 (10%)<br>21.7 ± 4.8 (35%) |
| GSH      | 1                         | 1 : 2 : 0.2                                           | GSH                 | Dark grey, unstable                           | n.a.                                                     |
| GSH      | 1                         | 1 : 2 : 0.2                                           | NaBH <sub>4</sub>   | Dark grey, unstable                           | n.a.                                                     |
| GSH      | 1                         | 1 : 2 : 1                                             | GSH                 | Red, unstable                                 | n.a.                                                     |
| GSH      | 1                         | 1 : 2 : 1                                             | NaBH <sub>4</sub>   | Brown, unstable                               | n.a.                                                     |
| GSH      | 1                         | 1 : 10 : 0.2                                          | NaBH <sub>4</sub>   | Yellow, turns purple, stable                  | 10.2 ± 1 (48%)<br>37.4 ± 6.5 (29%)<br>168.4 ± 67.3 (22%) |
| GSH      | 3                         | 1 : 10 : 1                                            | NaBH <sub>4</sub>   | Yellow, turns reddish, stable                 | 6.4 ± 0.8 (65%)<br>65.1 ± 3.8 (33%)                      |

**Table S3:** Overview of published data on the toxic effects of silver (AgNPs) and gold nanoparticles (AuNPs) to L929 cells *in vitro*, depending on their physico-chemical properties and concentration.

| NP type | Size [nm]                | $\zeta$ [mV] | Coating            | Concentration applied, mg L <sup>-1</sup> | Endpoint measured | Method       | Result                                                                                                        | Reference |
|---------|--------------------------|--------------|--------------------|-------------------------------------------|-------------------|--------------|---------------------------------------------------------------------------------------------------------------|-----------|
| AuNP    | 36.3 ± 12.4              | -49.4 ± 3.0  | PVP                | 1 – 400                                   | viability         | WST-8        | No reduction in viability at highest concentration                                                            | [1]       |
| AuNP    | 0.8, 1.2, 1.4, 1.8, 15.0 | /            | TPPMS <sup>I</sup> | /                                         | viability         | MTT          | Viability reduction in NPs of 1.8 nm or smaller; EC <sub>50</sub> 250 μM, 140 μM, 56 μM, 230 μM, respectively | [2]       |
| AuNP    | 19 ± 3                   | -35.7        | citrate            | 1 – 25                                    | viability         | MTT          | Significant cell death at 5 μg/mL or higher, after 48 h exposure, EC <sub>50</sub> 18. mg L <sup>-1</sup>     | [3]       |
| AgNP    | /                        | /            | PVP                | 25 – 100                                  | apoptosis         | annexin V/PI | >90% live cells after 24h, 5.5% early apoptotic at highest conc., no necrosis                                 | [5]       |
| AgNP    | 5                        | /            | PVP                | 0.1 – 100                                 | viability         | MTT          | Significant cell death at 25 μg/mL (cca 50%)                                                                  | [6]       |

<sup>I</sup>triphenylphosphine monosulfonated

**Table S4:** Overview of the results of 48 h acute toxicity testing of gold and silver nanoparticles to *Daphnia magna* Straus, depending on their physico-chemical properties and concentration.

| NP type | Size [nm]                         | $\zeta$ [mV]                    | Coating           | Concentration(s) applied                       | Result                                                                                 | Reference |
|---------|-----------------------------------|---------------------------------|-------------------|------------------------------------------------|----------------------------------------------------------------------------------------|-----------|
| AgNP    | 55.4 ± 10.1<br>and<br>89.3 ± 21.5 | -33.6±8.3<br>and<br>-25.7 ± 7.9 | PVP               | N/A                                            | 100% mortality at 100 µg L <sup>-1</sup> ,<br>no mortality below 10 µg L <sup>-1</sup> | [7]       |
| AgNP    | 39 ± 10                           | -0.13                           | PVP               | N/A                                            | EC <sub>50</sub> 14.81 µg L <sup>-1</sup>                                              | [8]       |
| AgNP    | 8.4 ± 2.8                         | /                               | PVP               | N/A                                            | EC <sub>50</sub> 54.0 ± 1.4 µg L <sup>-1</sup>                                         | [9]       |
| AgNP    | 35                                | /                               | PVP               | N/A                                            | EC <sub>50</sub> 10.48 ± 3.23 µg L <sup>-1</sup>                                       | [10]      |
| AgNP    | 40-50                             | -19.6 ± 3.5                     | carbonate         | 20, 50, 100, 200<br>and 500 mg L <sup>-1</sup> | No mortality up to 500 mg L <sup>-1</sup>                                              | [11]      |
| AgNP    | 28.3 ± 0.8                        | /                               | PVP               | 0–51<br>nmol L <sup>-1</sup>                   | EC <sub>50</sub> 55 ± 16 nmol L <sup>-1</sup>                                          | [12]      |
| AuNP    | 21                                | /                               | bare              | N/A                                            | EC <sub>50</sub> ~70 mg L <sup>-1</sup>                                                | [13]      |
| AuNP    | 14 ± 4                            | -14 ± 8                         | citrate           | 0.1 – 10 mg L <sup>-1</sup>                    | EC <sub>10</sub> ≥ 10 mg L <sup>-1</sup>                                               | [14]      |
|         | 17.9 ± 0.9                        | 17.9 ± 0.9                      | PAH <sup>I</sup>  |                                                | 40% mortality at 10 µg/L                                                               |           |
| AuNP    | 12.8 ± 1.2                        | -15.3 ± 1.5                     | citrate           | 0.001–25 mg L <sup>-1</sup>                    | No mortality at highest conc.                                                          | [15]      |
|         | 8.0 ± 1.2                         | -18.5 ± 1.3                     | MPA <sup>II</sup> |                                                | No mortality at highest conc.                                                          |           |

<sup>I</sup> polyallylamine hydrochloride

<sup>II</sup> 3-mercaptopropionic acid

## References

1. Hashimoto, M.; Yamaguchi, S.; Sasaki, J. I.; Kawai, K.; Kawakami, H.; Iwasaki, Y.; Imazato, S. *Eur. J. Oral Sci.* **2016**, *124*, 68. doi:[10.1021/acsnano.6b06040](https://doi.org/10.1021/acsnano.6b06040)
2. Pan, Y.; Neuss, S.; Leifert, A.; Fischler, M.; Wen, F.; Simon, U.; Schmid, G.; Brandau, W.; Jahnen-Dechent, W. *Small* **2007**, *3*, 1941. doi:[10.1055/s-0042-112810](https://doi.org/10.1055/s-0042-112810)
3. Tan, G.; Onur, M. A. *J. Biomed. Mater. Res., Part A* **2018**, *106*, 1708. doi:[10.2147/IJN.S153167](https://doi.org/10.2147/IJN.S153167)
4. Park, E. J.; Yi, J.; Kim, Y.; Choi, K.; Park, K. *Toxicol. In Vitro* **2010**, *24*, 872. doi:[10.1007/s00204-014-1245-3](https://doi.org/10.1007/s00204-014-1245-3)
5. Wei, L.; Tang, J.; Zhang, Z.; Chen, Y.; Zhou, G.; Xi, T. *Biomed. Mater.* **2010**, *5*, 044103. doi:[10.3390/ijms17091534](https://doi.org/10.3390/ijms17091534)
6. Takamiya, A. S.; Monteiro, D. R.; Bernabé, D. G.; Gorup, L. F.; Camargo, E. R.; Gomes-Filho, J. E.; Oliveira, S. H. P.; Barbosa, D. B. *J. Endod.* **2016**, *42*, 953. doi:[10.1002/wnan.1322](https://doi.org/10.1002/wnan.1322)
7. Li, L. Z.; Wu, H.; Ji, C.; van Gestel, C. A. M.; Allen, H. E.; Peijnenburg, W. J. G. M. *Ecotoxicol. Environ. Saf.* **2015**, *119*, 66. doi:[10.1016/j.jfda.2014.01.010](https://doi.org/10.1016/j.jfda.2014.01.010)
8. Newton, K. M.; Puppala, H. L.; Kitchens, C. L.; Colvin, V. L.; Klaine, S. J. *Environ. Toxicol. Chem.* **2013**, *32*, 2356. doi:[10.1002/jat.2792](https://doi.org/10.1002/jat.2792)
9. Blinova, I.; Niskanen, J.; Kajankari, P.; Kanarbik, L.; Käkinen, A.; Tenhu, H.; Penttinen, O. P.; Kahru, A. *Environ. Sci. Pollut. Res.* **2013**, *20*, 3456. doi:[10.1002/jps.24001](https://doi.org/10.1002/jps.24001)
10. Poynton, H. C.; Lazorchak, J. M.; Impellitteri, C. A.; Blalock, B. J.; Rogers, K.; Allen, H. J.; Loguinov, A.; Heckman, J. L.; Govindasmaw, S. *Environ. Sci. Technol.* **2012**, *46*, 6288. doi:[10.1897/08-002.1](https://doi.org/10.1897/08-002.1)
11. Zhao, C.-M.; Wang, W.-X. *Environ. Toxicol. Chem.* **2011**, *30*, 885. doi:[10.4491/eer.2010.15.1.428](https://doi.org/10.4491/eer.2010.15.1.428)
12. Khan, F. R.; Paul, K. B.; Dybowska, A. D.; Valsami-Jones, E.; Lead, J. R.; Stone, V.; Fernandes, T. F. *Environ. Sci. Technol.* **2015**, *49*, 4389. doi:[10.1002/etc.703](https://doi.org/10.1002/etc.703)
13. Li, T.; Albee, B.; Alemayehu, M.; Diaz, R.; Ingham, L.; Kamal, S.; Rodriguez, M.; Whaley Bishnoi, S. *Anal. Bioanal. Chem.* **2010**, *398*, 689. doi:[10.1016/j.tiv.2011.03.008](https://doi.org/10.1016/j.tiv.2011.03.008)
14. Skjolding, L. M.; Kern, K.; Hjorth, R.; Hartmann, N.; Overgaard, S.; Ma, G.; Veinot, J. G. C.; Baun, A. *Ecotoxicology* **2014**, *23*, 1172. doi:[10.1021/es062629t](https://doi.org/10.1021/es062629t)
15. Bozich, J. S.; Lohse, S. E.; Torelli, M. D.; Murphy, C. J.; Hamers, R. J.; Klaper, R. D. *Environ. Sci.: Nano* **2014**, *1*, 260. doi:[10.1021/es8026314](https://doi.org/10.1021/es8026314)
